# Supplementary material
Source: publisher site journal article supplement (https://www.dovepress.com/article/443276)
Supplement: Supplementary file 1 [file get_supplementary_file.php]

## Supplemental Material

## Factor Invariances of the Life Satisfaction

Multi-group Confirmatory Factor Analysis (MGCFA) was used to assess metric invariance and scalar invariance for life satisfaction across 31 provinces. We expected to find support only for the metric invariance, as scalar invariance is hardly found in large cross-regional comparisons.1-4 We used the ΔCFI and ΔRMSEA values of .010 and .015, respectively, as evidence of pronounced difference between nested models.5,6

Table S1 presents the results of MGCFA. The metric invariance of life satisfaction across 31 provinces were supported, as the difference in practical fit indice between the configural and metric models was very small for CFI (ΔCFA less than .010) and RMSEA (ΔRMSEA less than .015).

The scalar invariance of life satisfaction was not supported. The difference in practical fit indice between the metric and scalar models for the other five dimensions of SWB were very small for RMSEA (ΔRMSEA = .000), but above the recommended .010 threshold for the CFI (ΔCFA = .019). These results were consistent with previous studies which found that the scalar invariance of life satisfaction scales was not supported.1,7

### Table S1

*Measurement Invariance of the Life Satisfaction across 31 Provinces*

| Model | χ*2* | Δχ*2* | *df* | Δ*df* | *p* | χ*2/df* | CFI | ΔCFI | RMSEA | ΔRMSEA | 90% CI RMSEA |
| --- | --- | --- | --- | --- | --- | --- | --- | --- | --- | --- | --- |
| Configural | 32839.975 |  | 5859 |  | 0.000 | 5.605 | 0.804 |  | 0.017 |  | 0.016–0.017 |
| Metric | 33809.528 | 969.553 | 6459 | 600 | 0.000 | 5.234 | 0.801 | –0.003 | 0.016 | –0.001 | 0.016–0.016 |
| Scalar | 37075.103 | 3265.575 | 7089 | 630 | 0.000 | 5.230 | 0.782 | –0.019 | 0.016 | 0.000 | 0.016–0.016 |

*Note.* Configural = Configural invariance, Metric = Metric invariance, Scalar = Scalar invariance.

**Reference:**

1. Jang S, Kim ES, Cao CH, et al. Measurement invariance of the satisfaction with life scale across 26 countries. *J Cross-Cult Psychol.* 2017; 48(4): 560–576. doi:10.1177/0022022117697844
2. Jovanović V, Joshanloo M, Martín-Carbonell M, et al. Measurement invariance of the scale of positive and negative experience across 13 countries. *Assessment*. 2022; 29(7):1507–1521. doi:10.1177/10731911211021494
3. Kocjan ZG, Jose P E, Sočan G, Avsec A. Measurement invariance of the subjective happiness scale across countries, gender, age, and time. *Assessment*. 2022; 29(4) :826–841.doi:10.1177/1073191121993558
4. Żemojtel-Piotrowska M, Piotrowski J P, Cieciuch J, et al. Measurement invariance of personal well-being index (PWI-8) across 26 countries. *J Happiness Stud*. 2017; 18(6): 1697–1711. doi:10.1007/s10902-016-9795-0
5. Chen FF. Sensitivity of goodness of fit indexes to lack of measurement invariance. *Struct Equ Model*.2007, 14(3):464-504. doi:10.1080/10705510701301834
6. Cheung GW, Rensvold RB. Evaluating goodness-of-fit indexes for testing measurement invariance. *Struct Equ Model*. 2002； 9(2)：233–255. doi:10.1207/S15328007SEM0902_5
7. Wu XJ, Gai XS, Xu LL, Liu FQ, Wang H, Kou HY. Family socioeconomic status (2002). provincial-level economic, educational, and health-related factors as predictors of present- and future-oriented subjective well-being in junior high school students in China. *J Adolesc*. 2022;94(3):354–365. doi:10.1002/jad.12027
